# Supplementary material for: Synthesis, biological evaluation and mechanism study of a class of cyclic combretastatin A-4 analogues as novel antitumour agents
Source: Royal Society of Chemistry journal article supplement (doi:10.1039/c5ra19270f), 2015-01-01
Supplement: c5ra19270f1.pdf [file c5ra19270f1.pdf]

## Synthesis, Biological Evaluation and Mechanisms Study of a Class of Cyclic CA-4 Analogues as Novel Antitumour Agents

Jun Yan, Yanqing Pang, Jie Chen, Jianfei Sheng, Jinhui Hu, Ling Huang, \* and Xingshu Li\*

**I. NMR spectra of target compounds ( 2-18 )**

**II. HPLC chromatograms of target compounds ( 19-25 )**

# I. NMR spectra of target compounds

4a

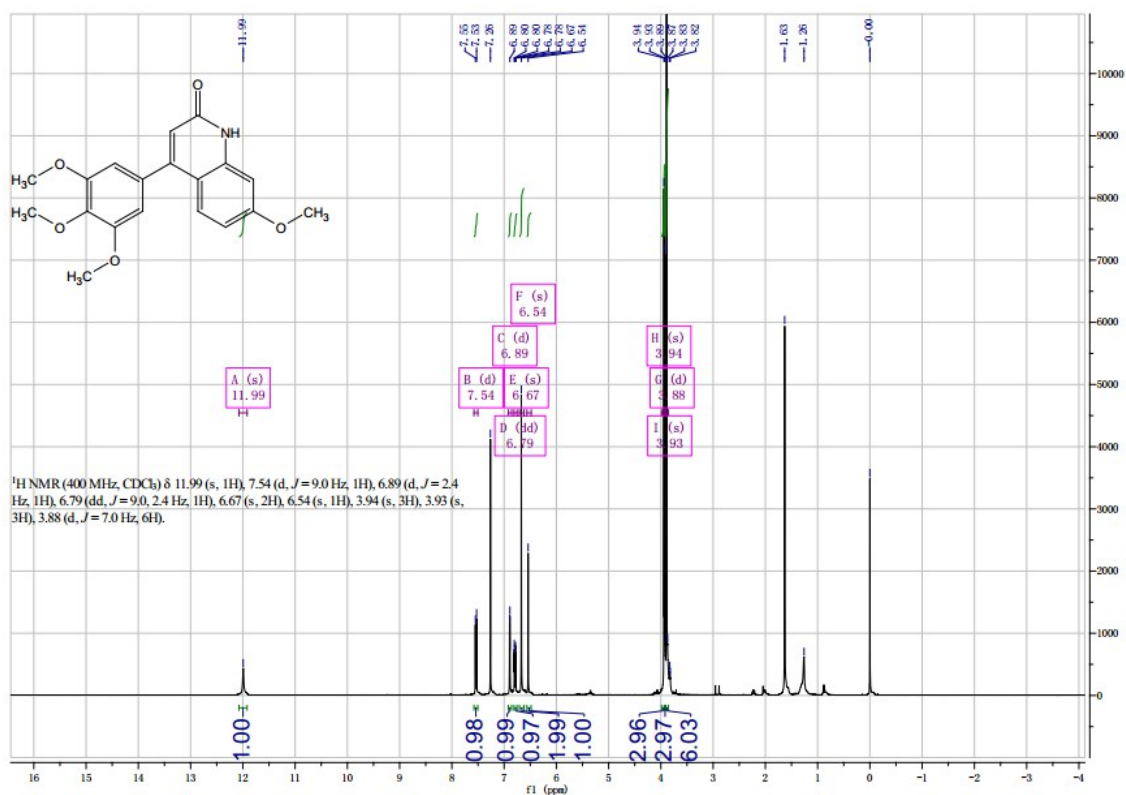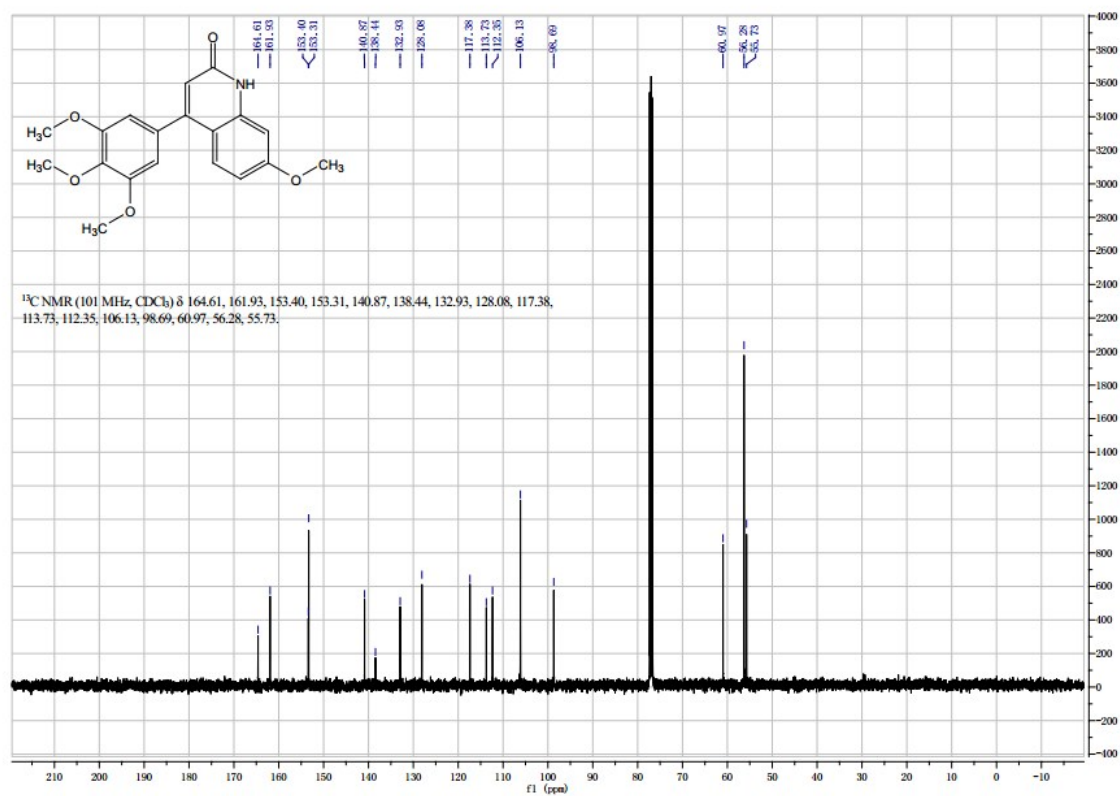

4b

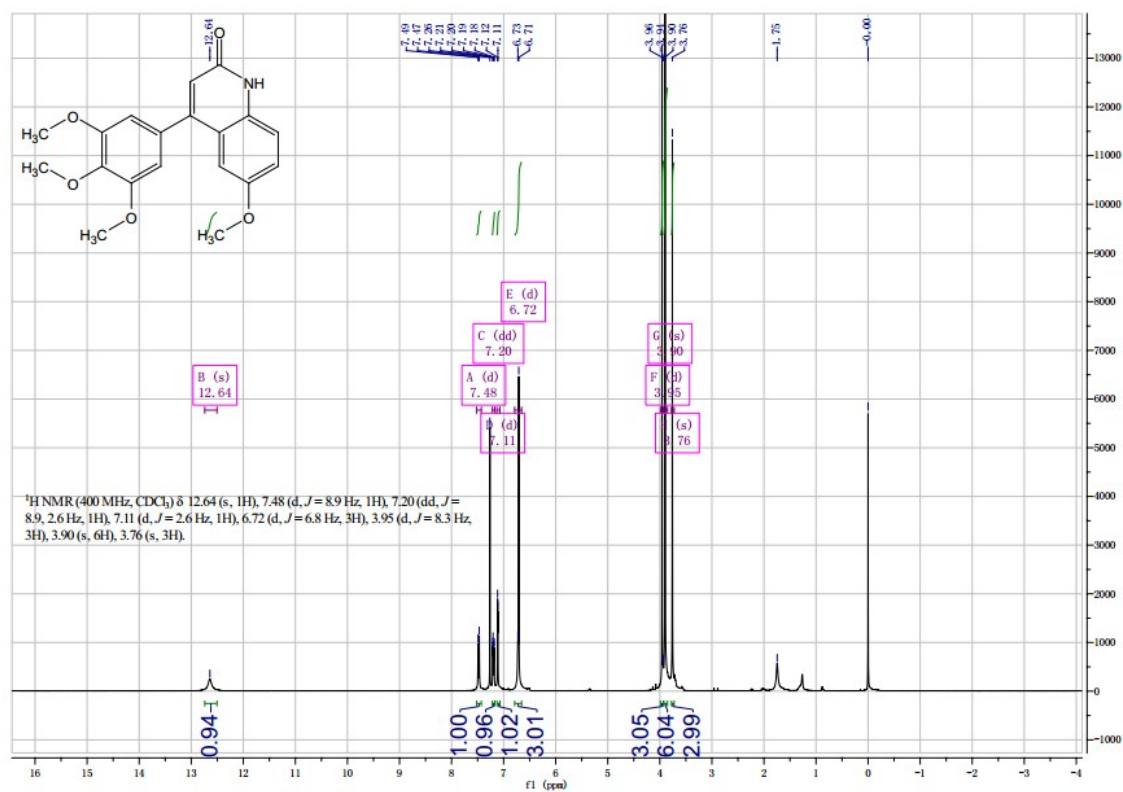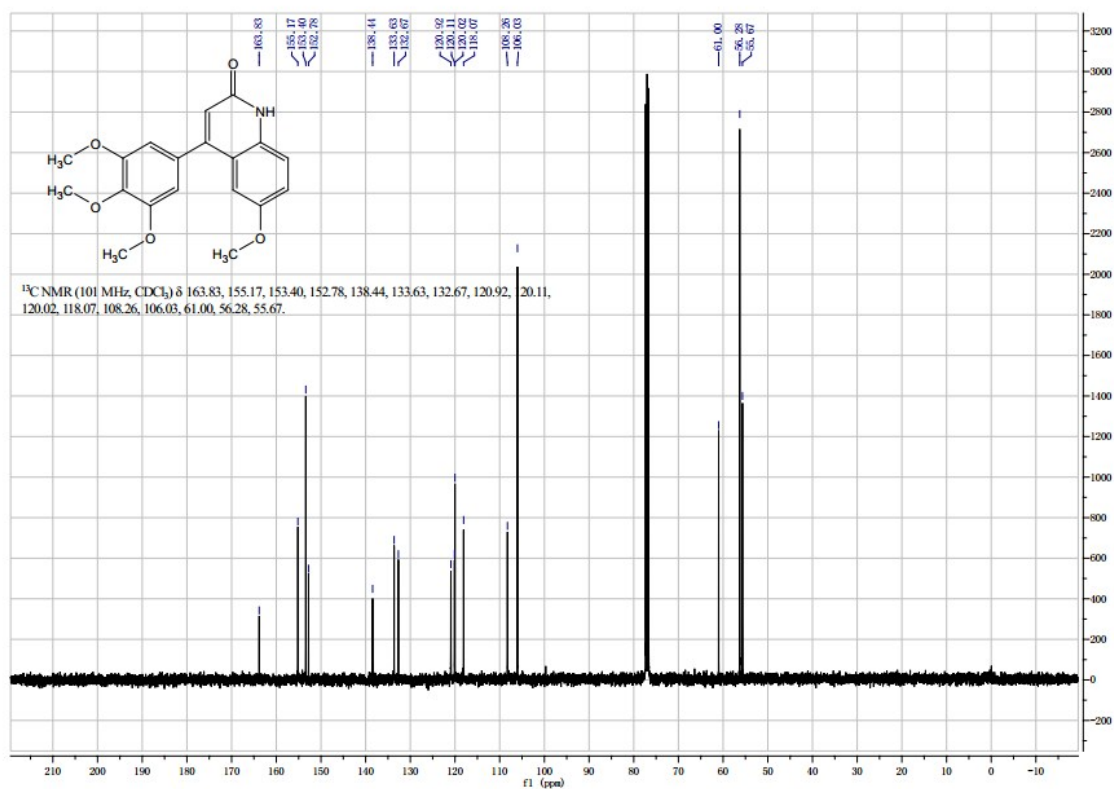

4c

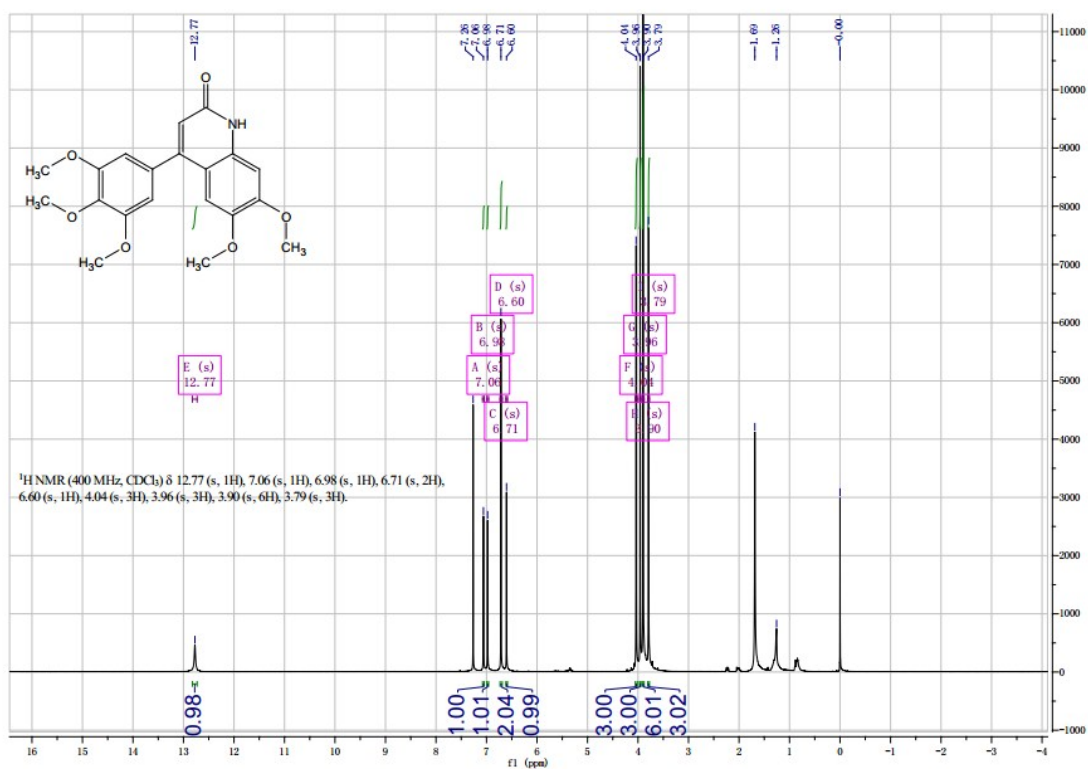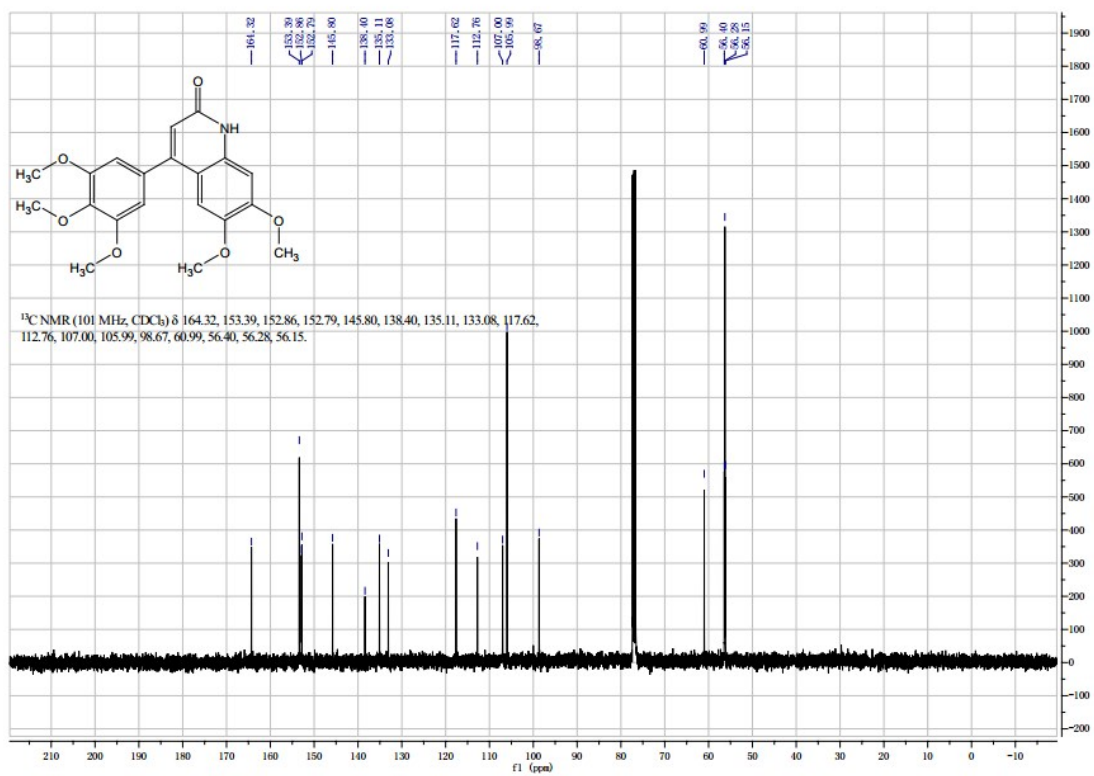

4d

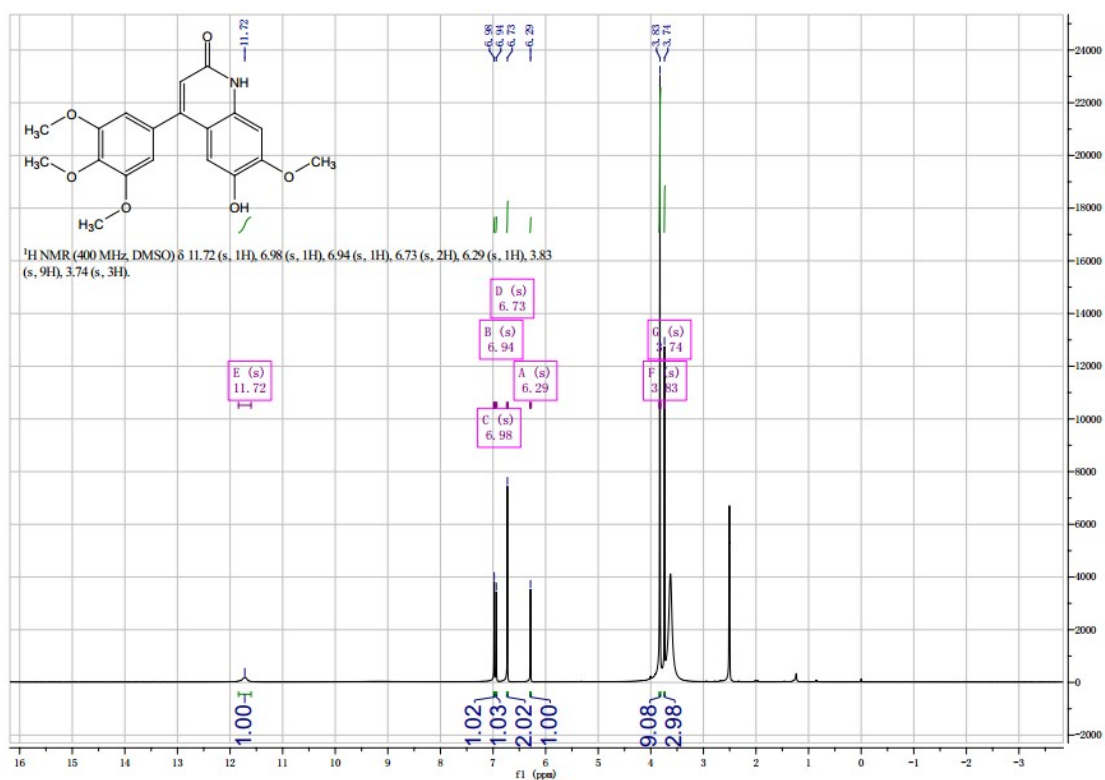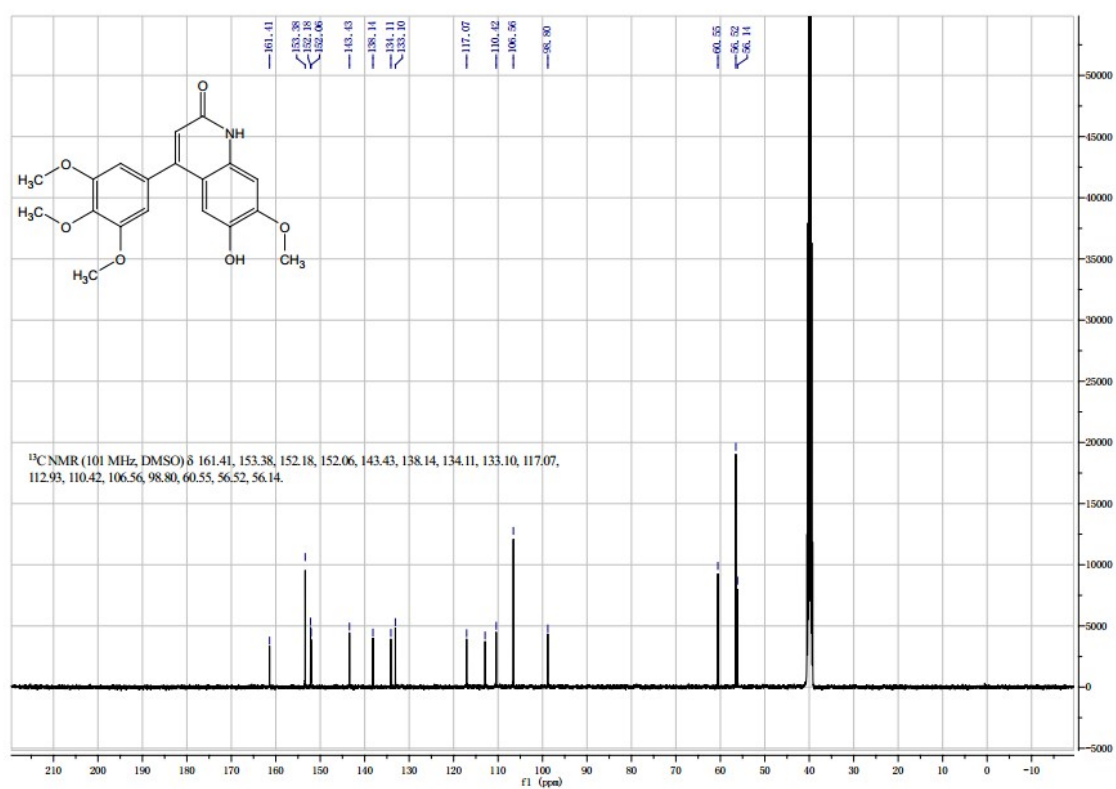

5

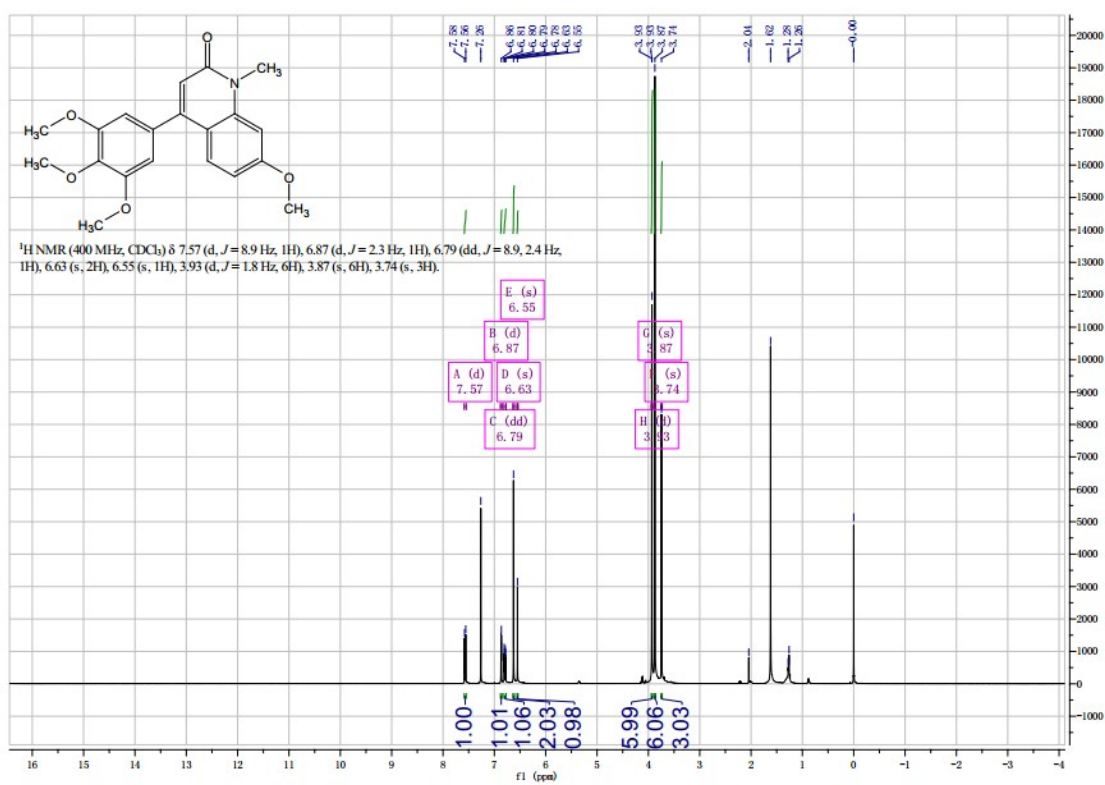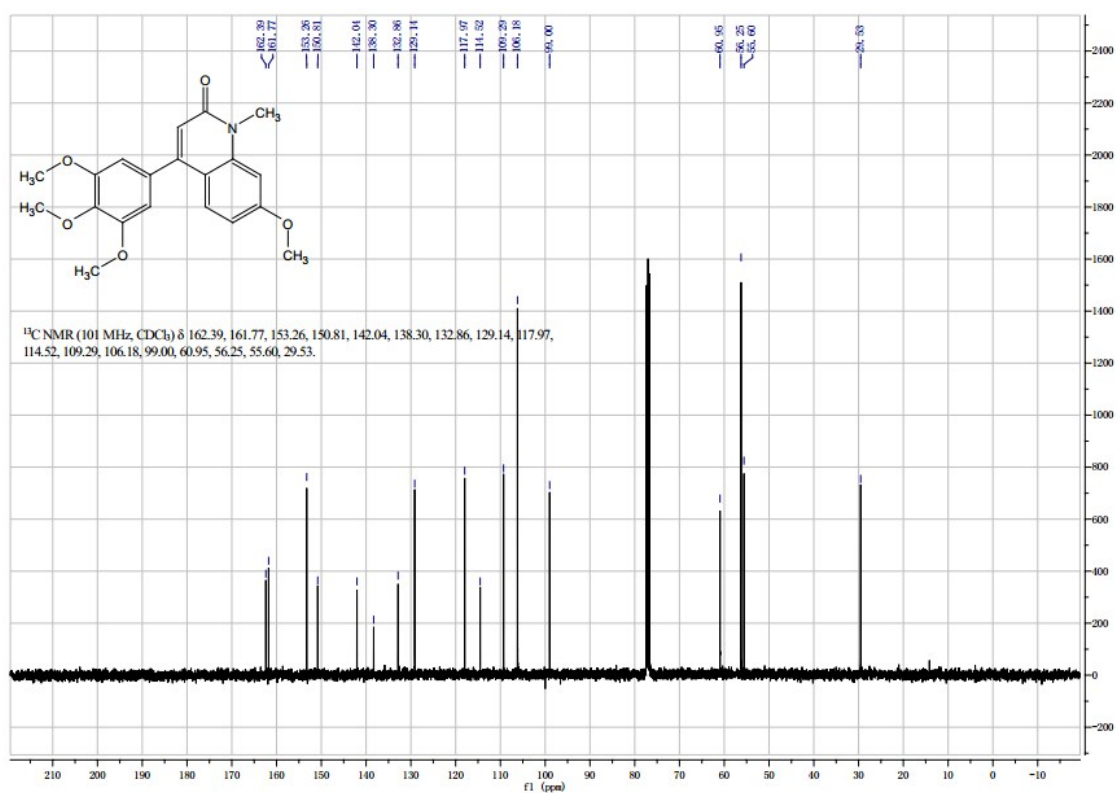

6

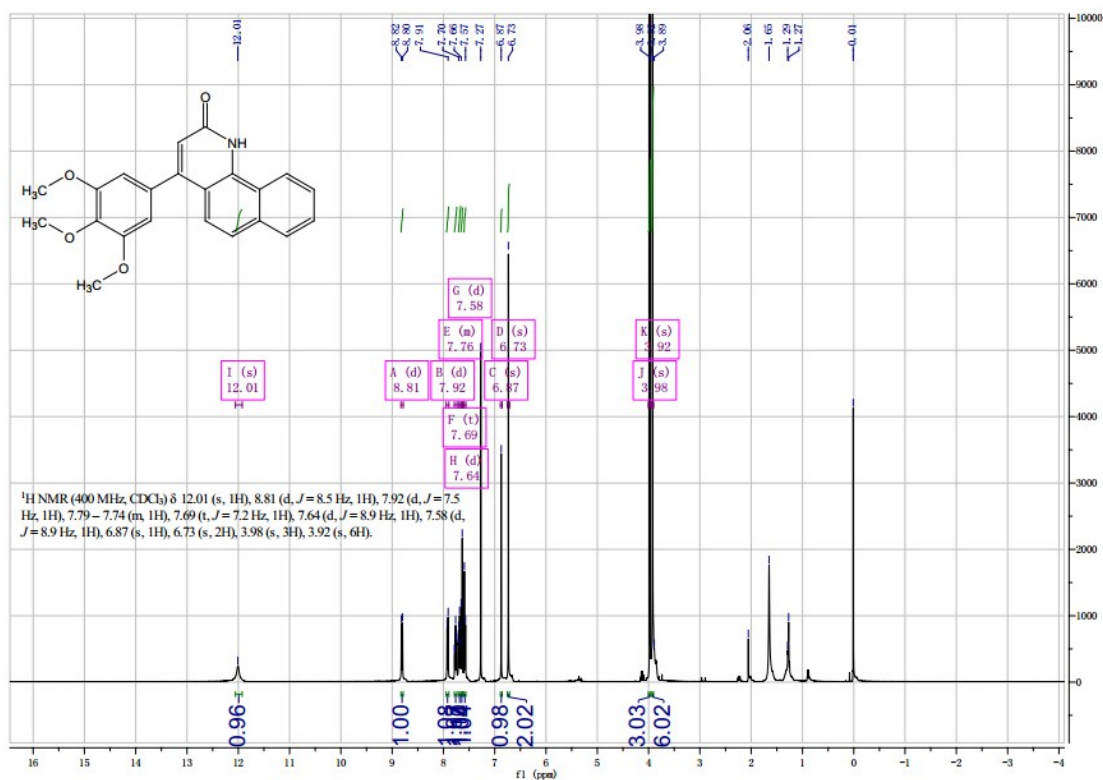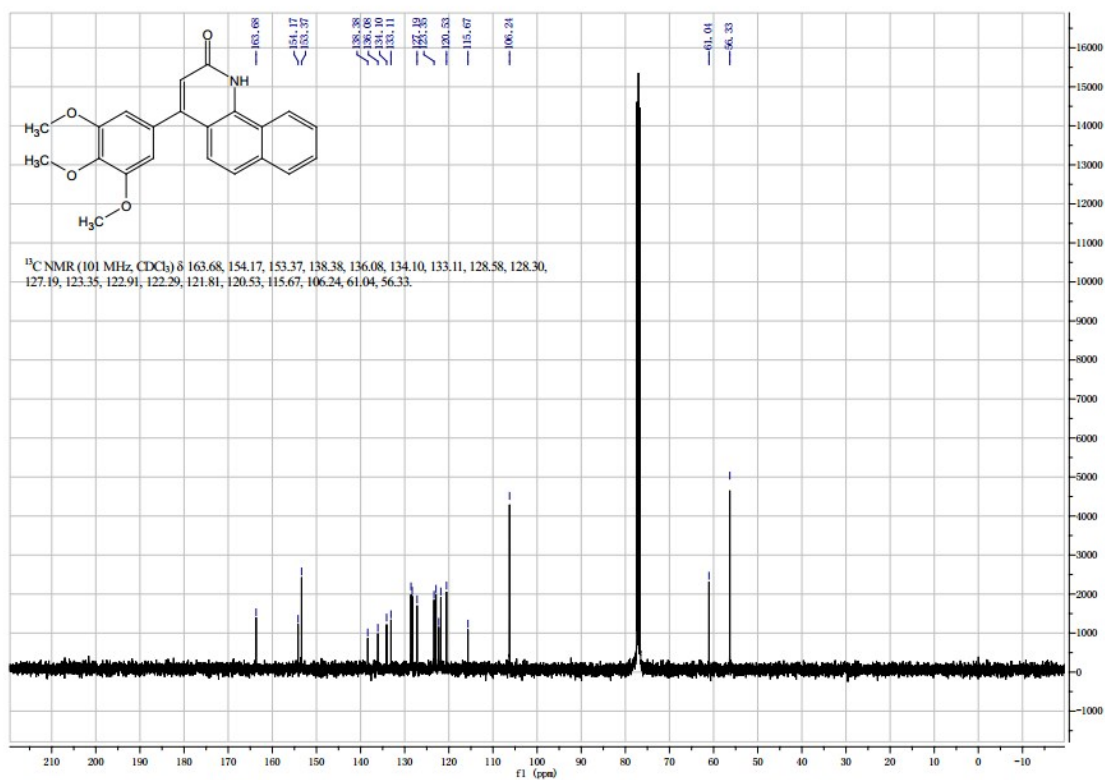



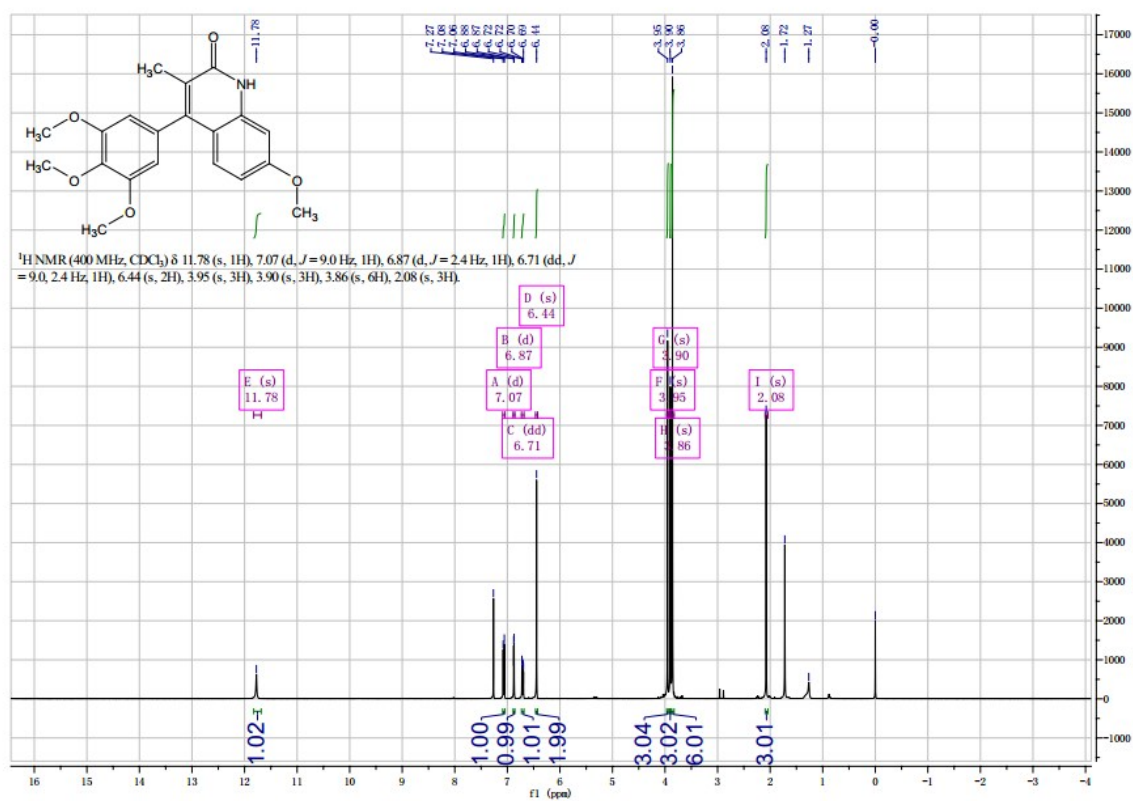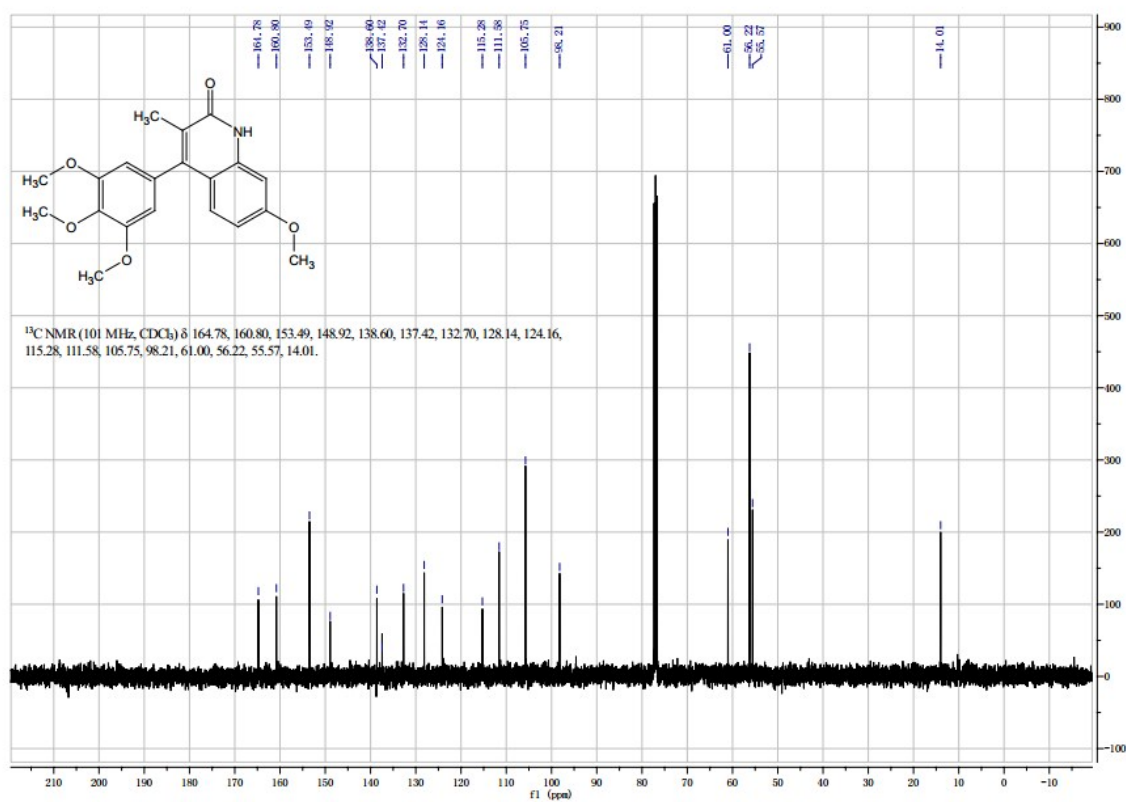



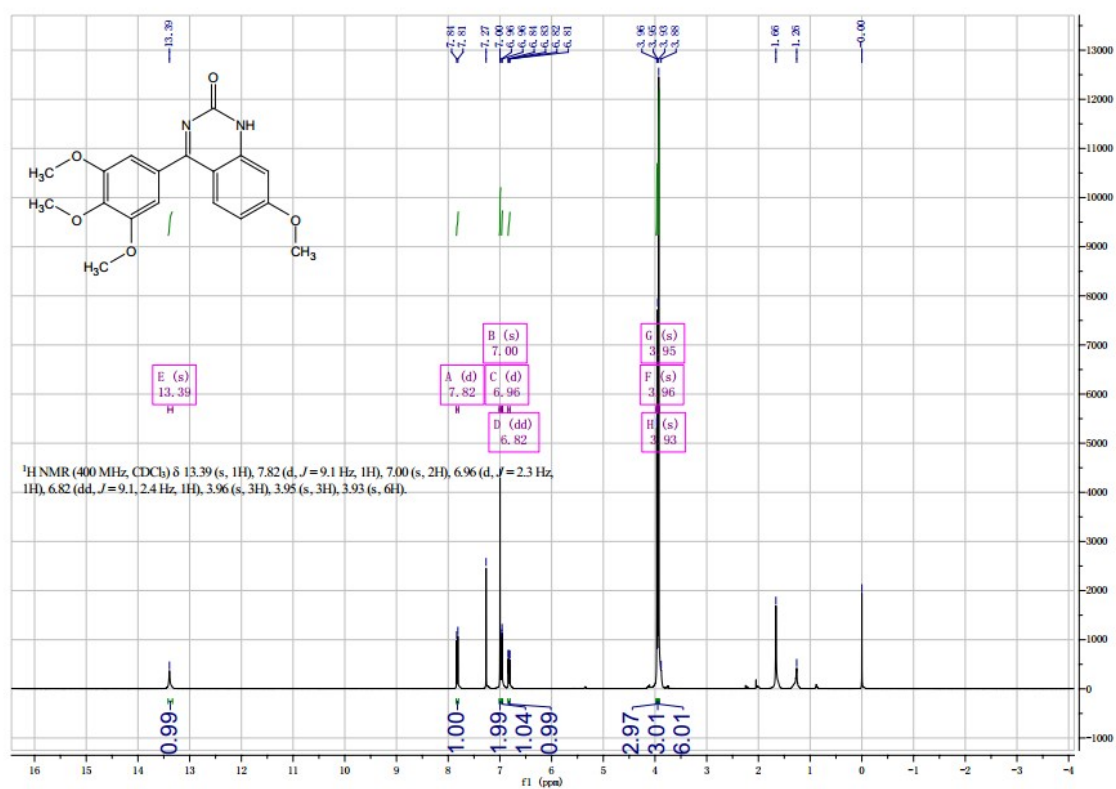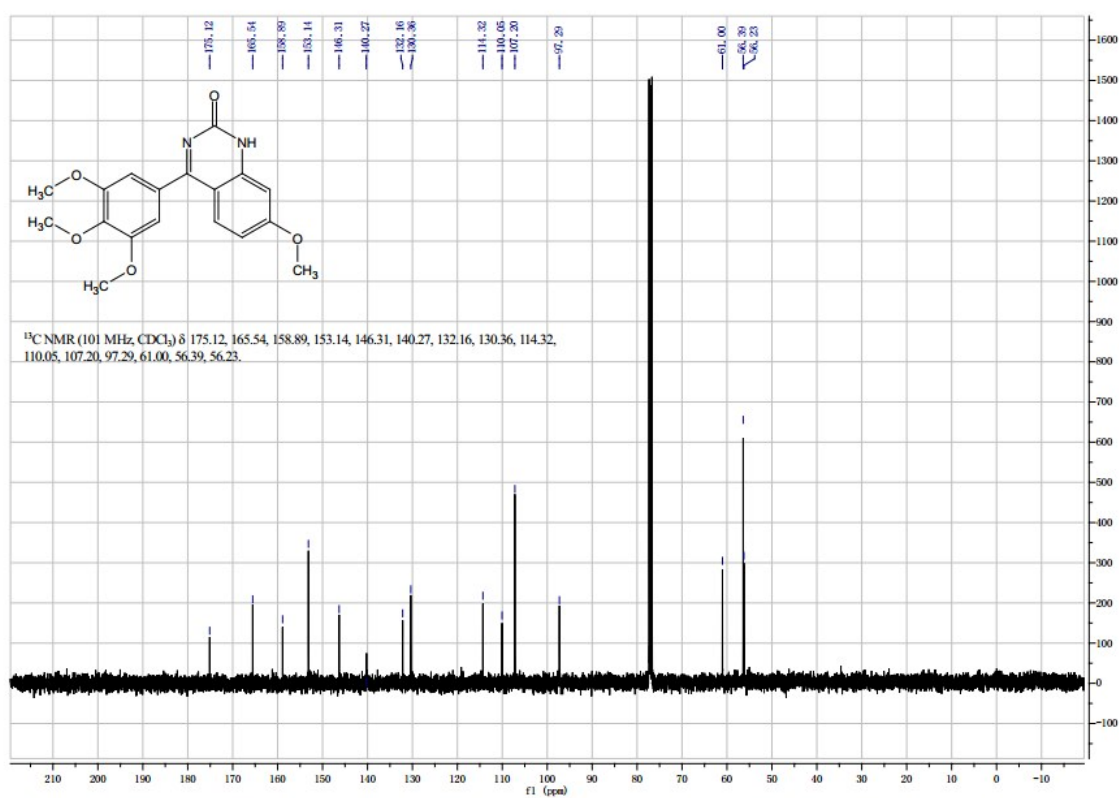

20a

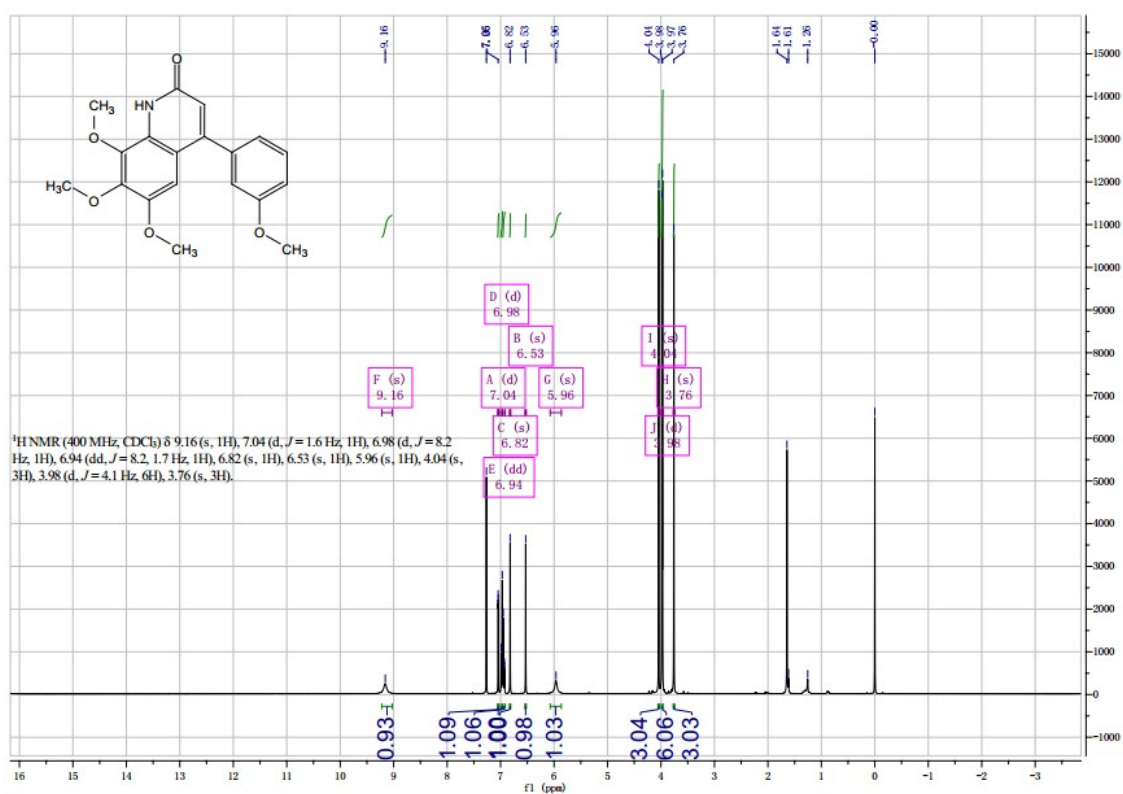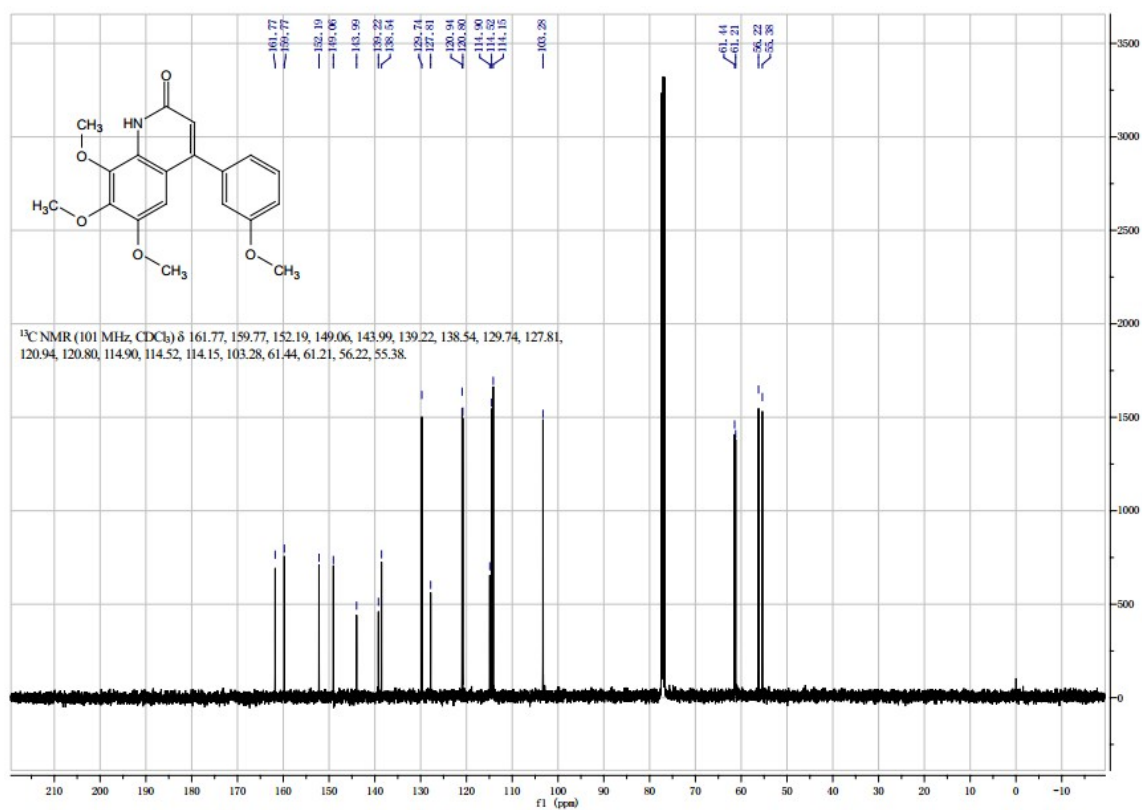

20b

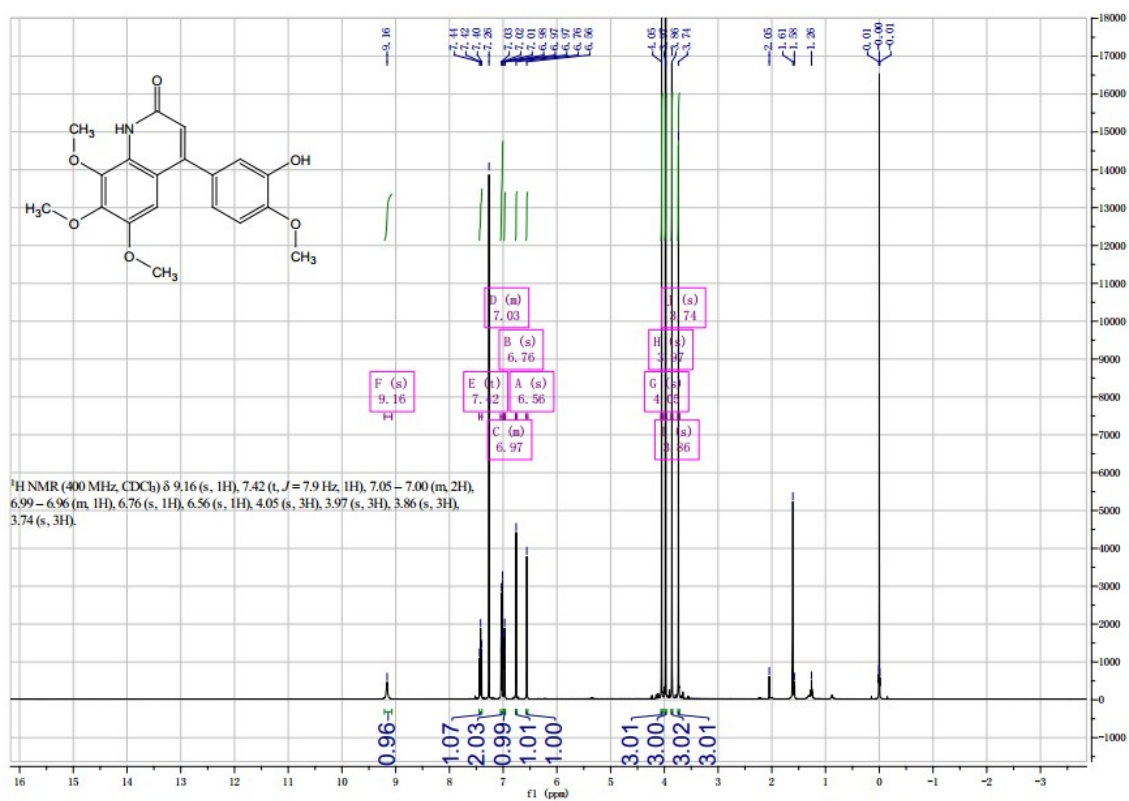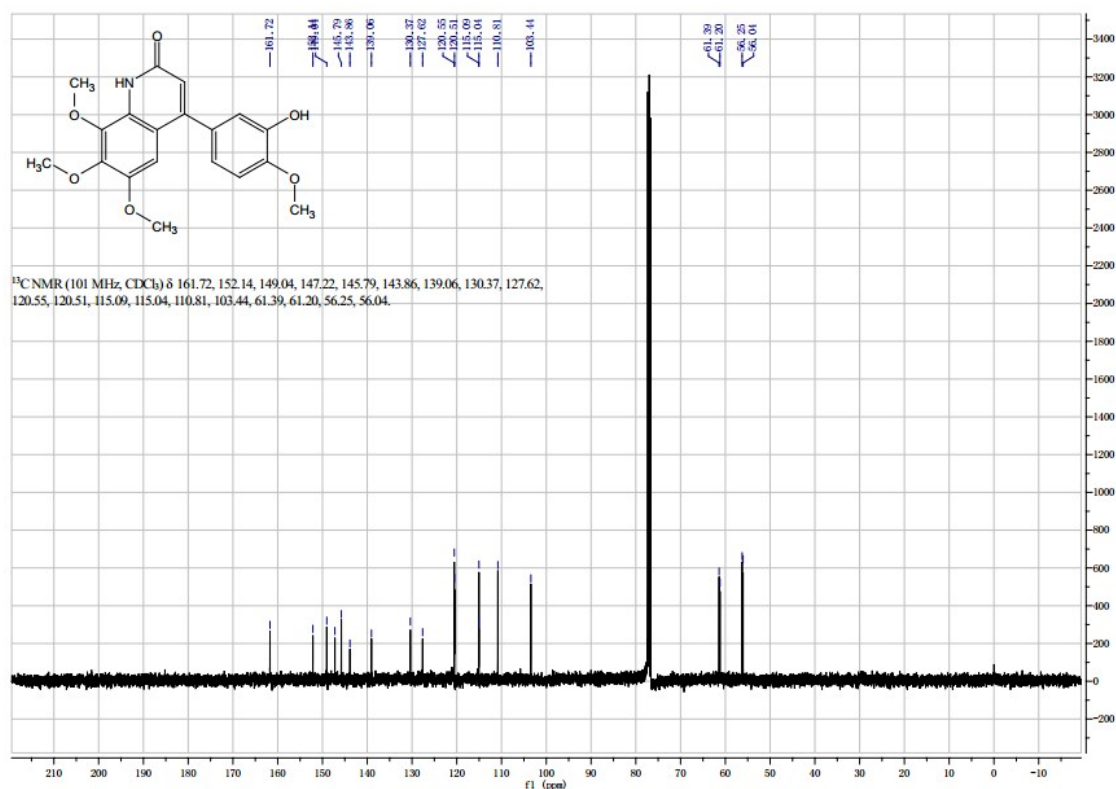



20d

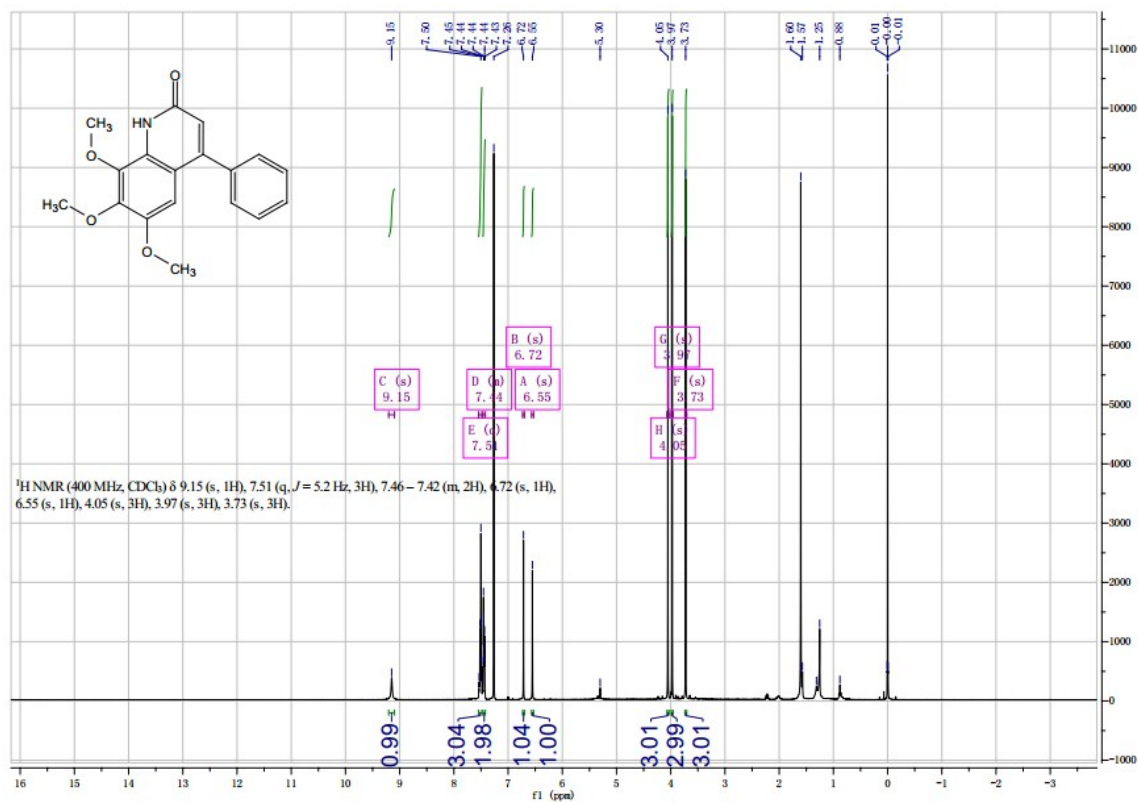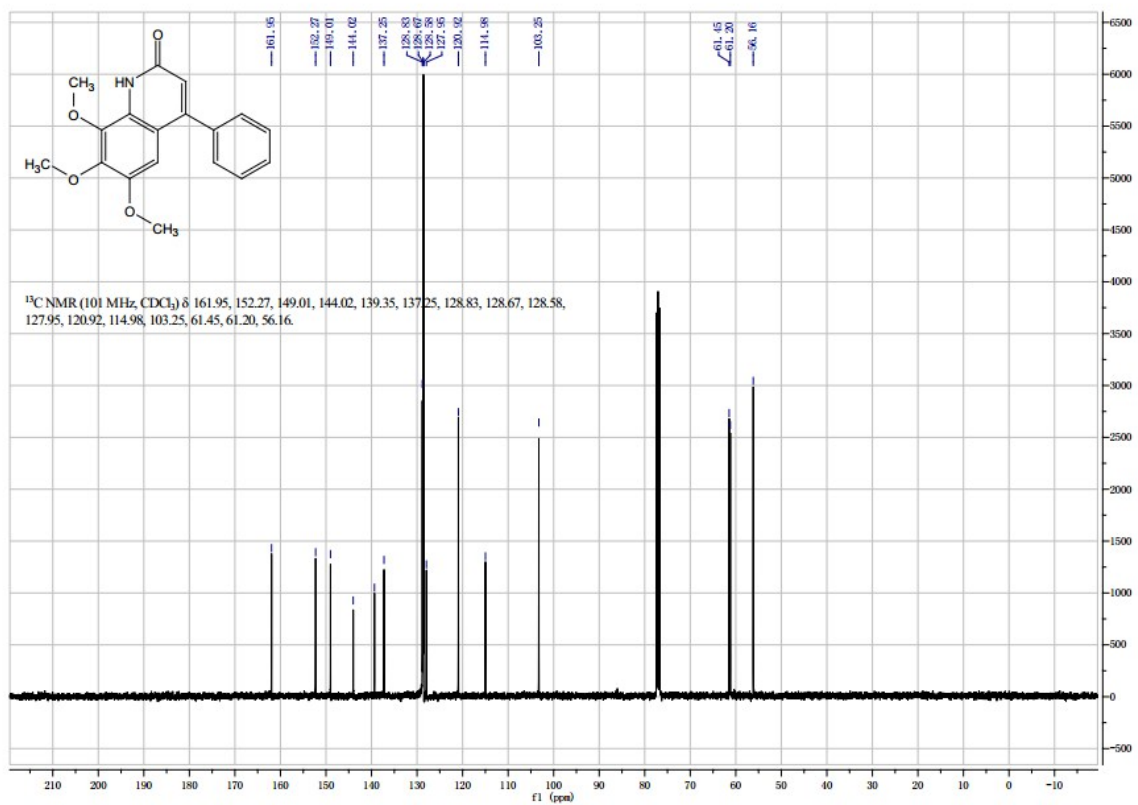

20e

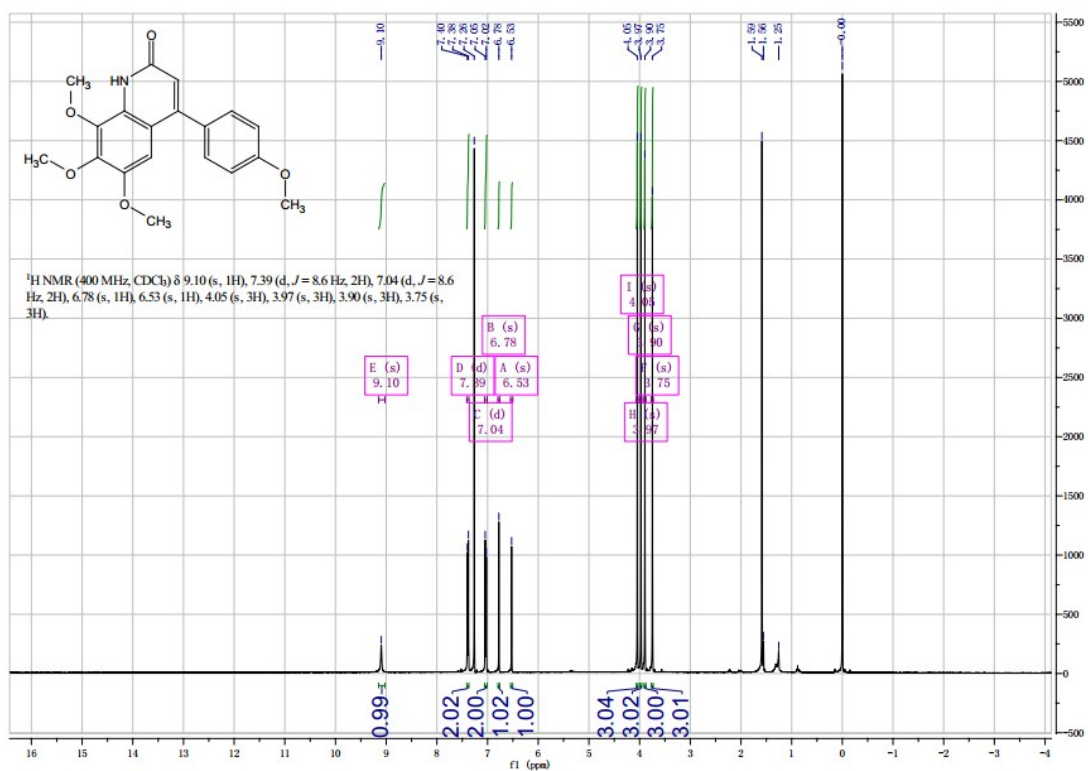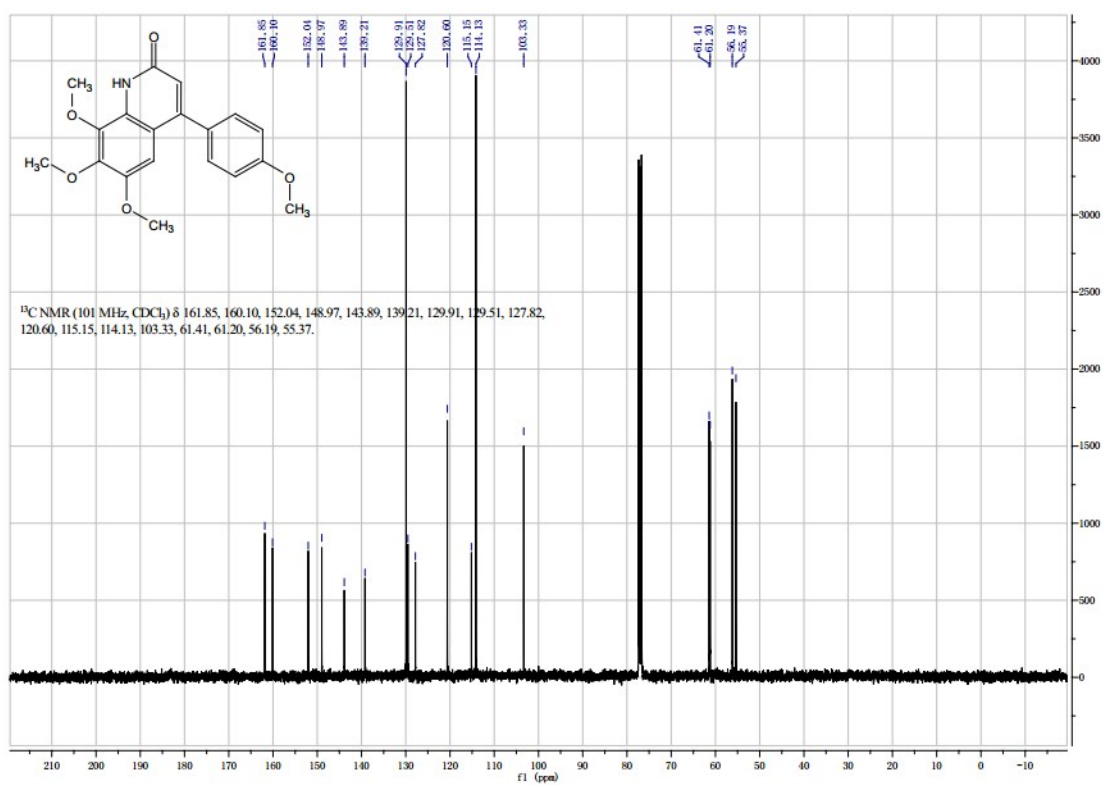







23b

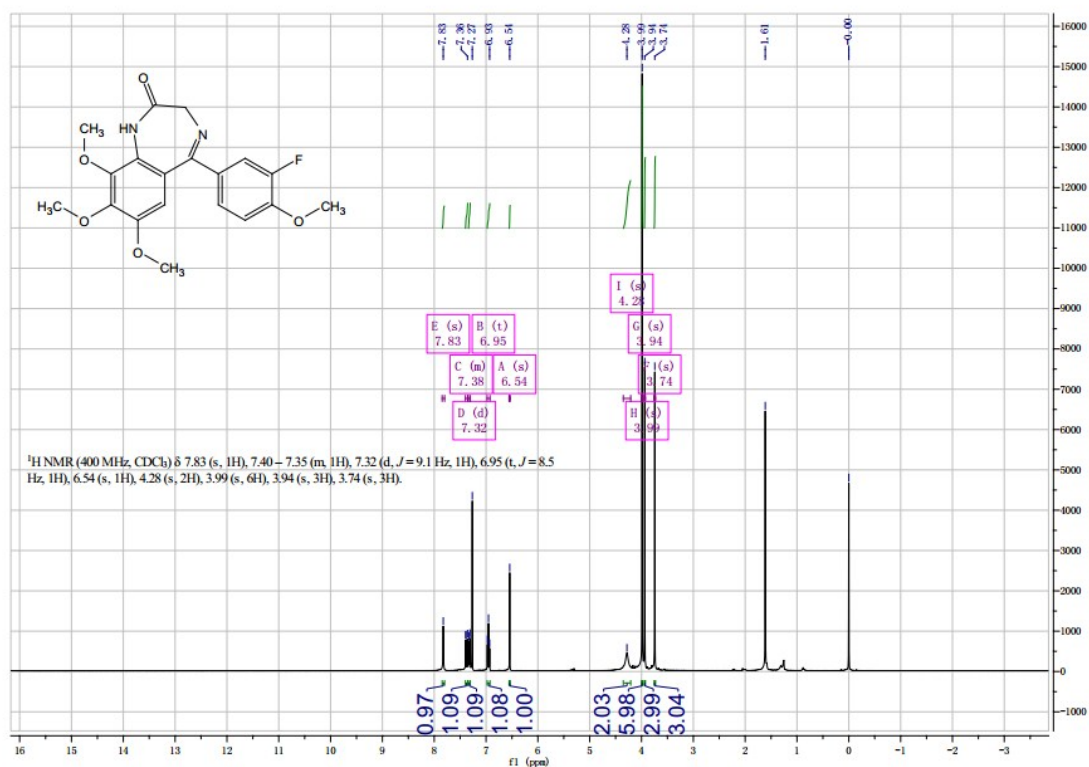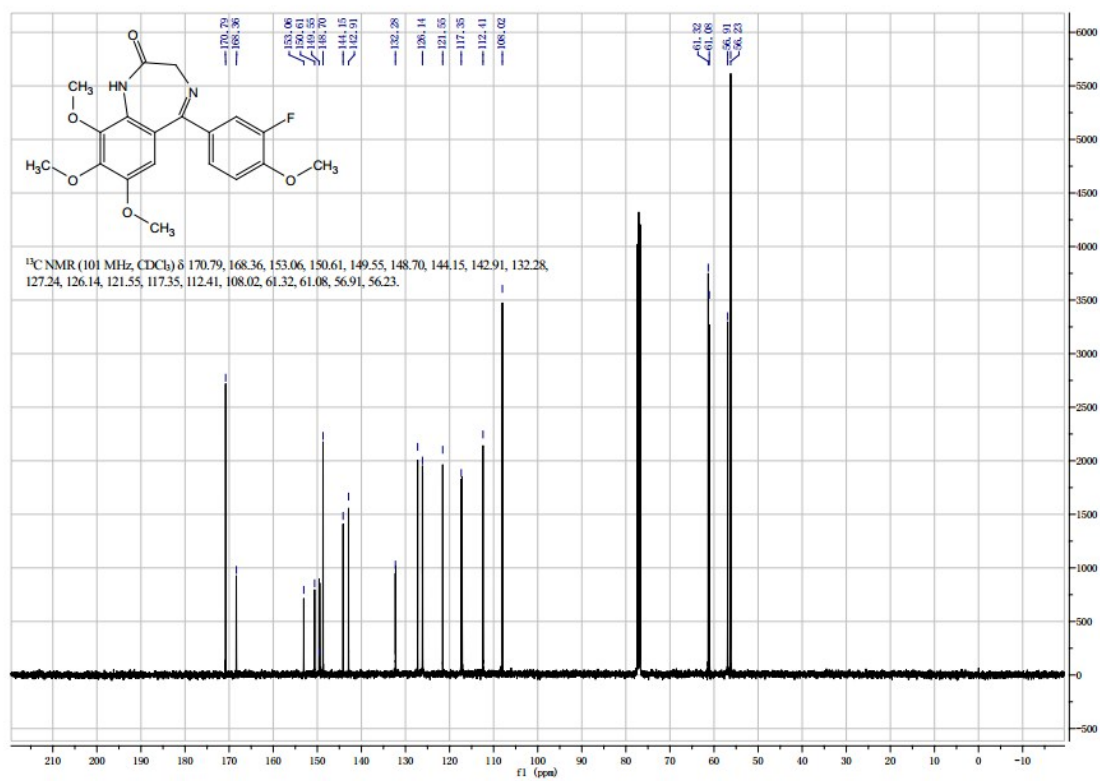

23c

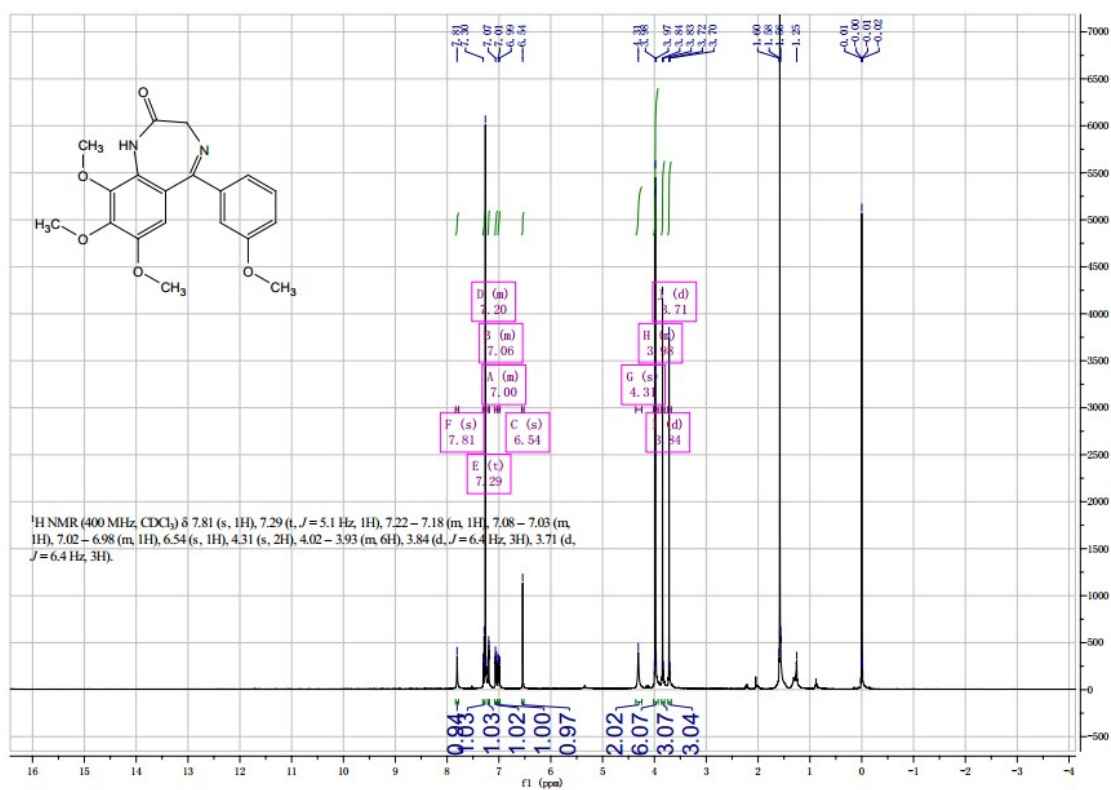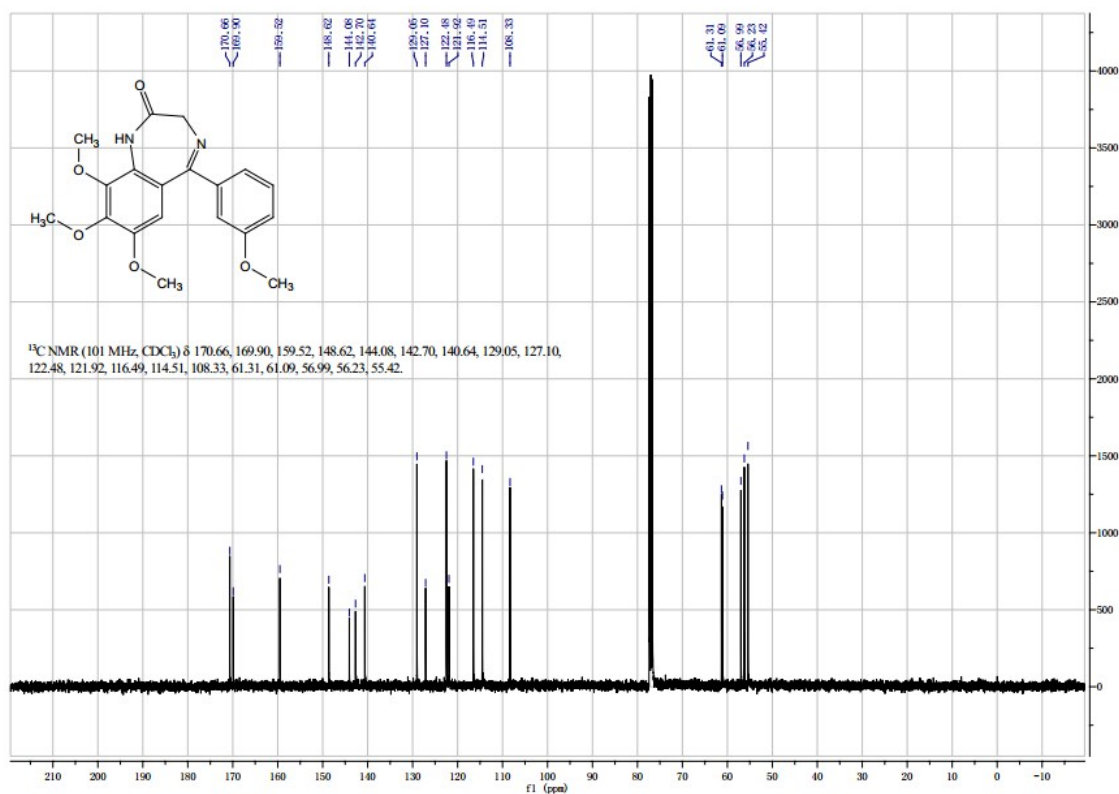

23d

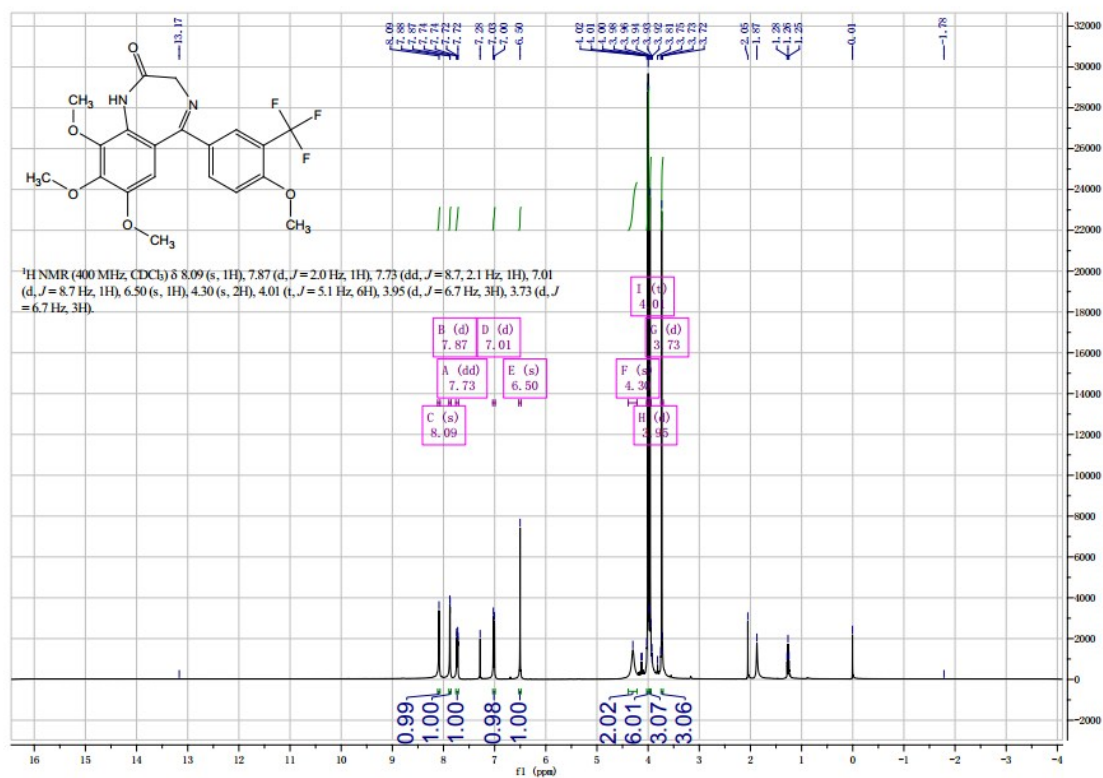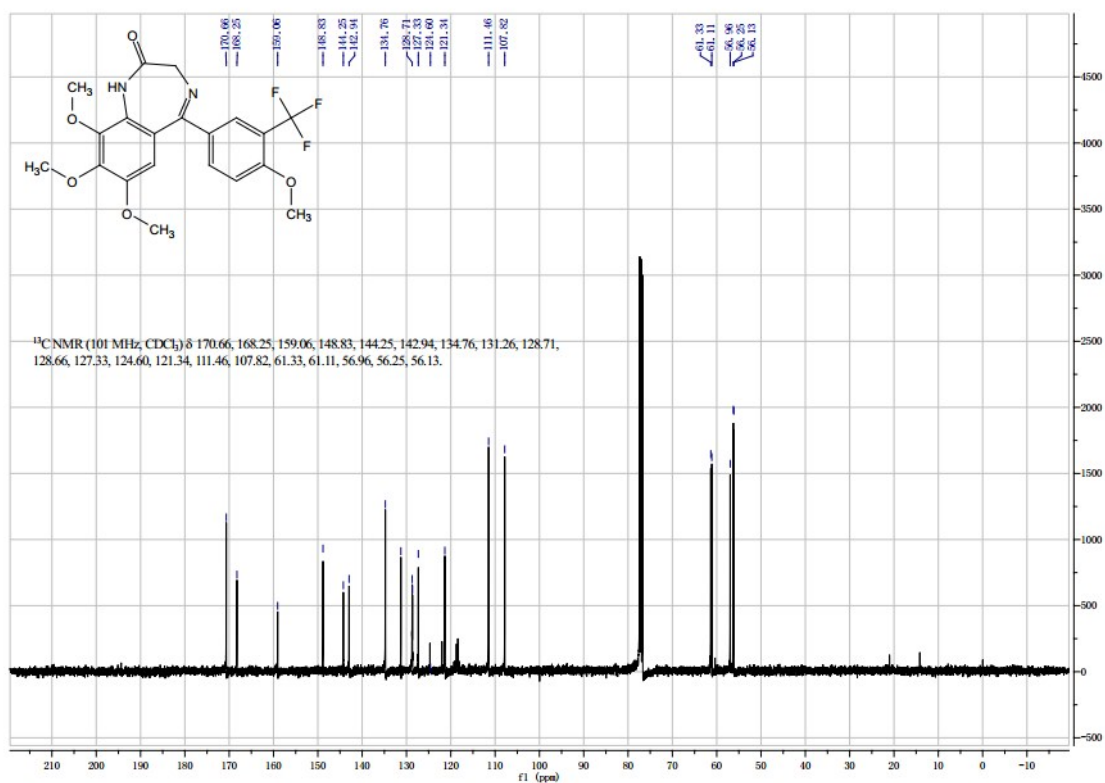

## II. HPLC chromatograms of target compounds

4a

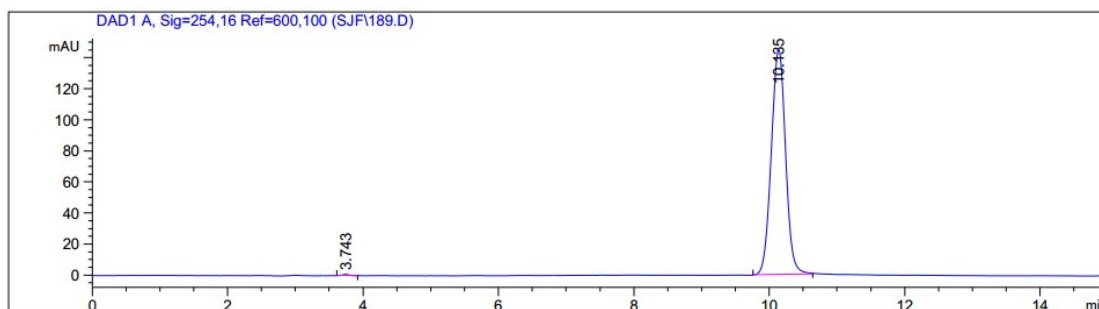

| Peak # | Retention time [min] | Type | Peak width [min] | Peak area [mAU*s] | Peak height [mAU] | Peak area % |
|--------|----------------------|------|------------------|-------------------|-------------------|-------------|
| 1      | 3.743                | BB   | 0.1102           | 5.89620           | 8.17430e-1        | 0.2769      |
| 2      | 10.135               | BB   | 0.2291           | 2123.43286        | 144.75177         | 99.7231     |

4b

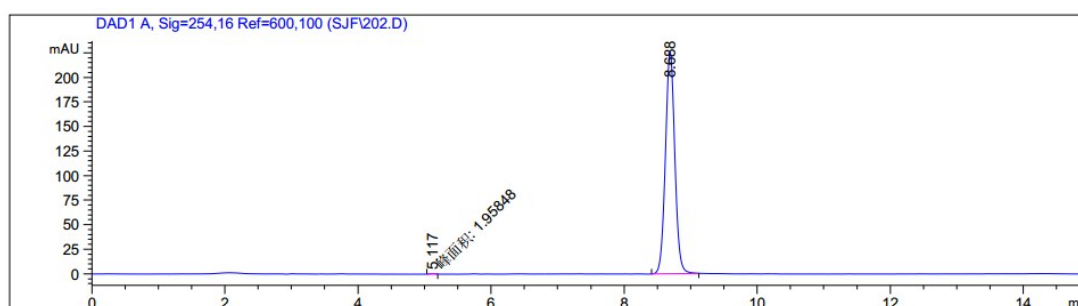

| Peak # | Retention time [min] | Type | Peak width [min] | Peak area [mAU*s] | Peak height [mAU] | Peak area % |
|--------|----------------------|------|------------------|-------------------|-------------------|-------------|
| 1      | 5.117                | MM T | 0.0919           | 1.95848           | 3.55151e-1        | 0.0882      |
| 2      | 8.688                | BB   | 0.1526           | 2217.67847        | 225.76378         | 99.9118     |

4c

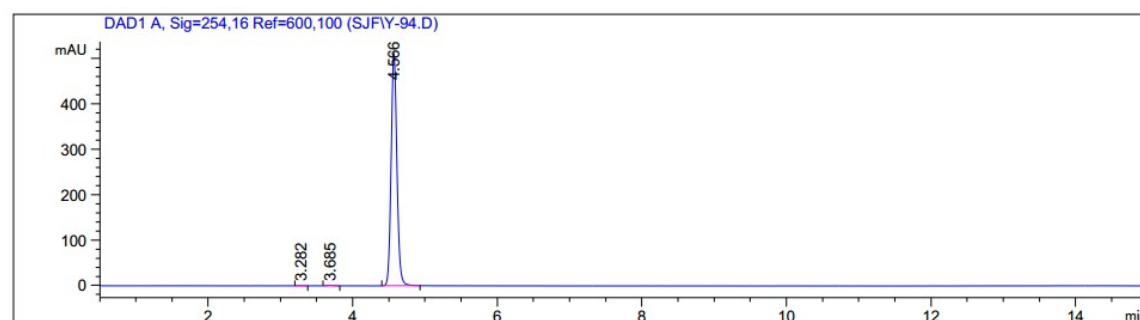

| Peak # | Retention time [min] | Type | Peak width [min] | Peak area [mAU*s] | Peak height [mAU] | Peak area % |
|--------|----------------------|------|------------------|-------------------|-------------------|-------------|
| 1      | 3.282                | BB   | 0.0641           | 1.32862           | 3.09245e-1        | 0.0466      |
| 2      | 3.685                | BB   | 0.0759           | 4.75948           | 9.58507e-1        | 0.1669      |
| 3      | 4.566                | BB   | 0.0868           | 2845.06567        | 512.05280         | 99.7865     |

4d

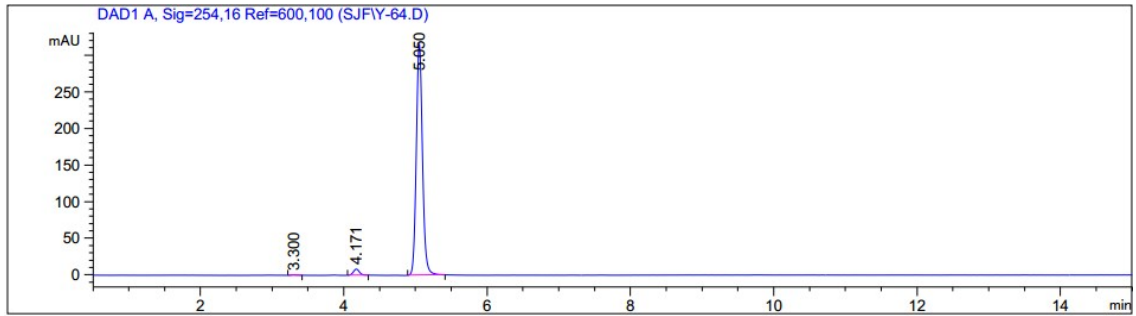

| Peak # | Retention time [min] | Type | Peak width [min] | Peak area [mAU*s] | Peak height [mAU] | Peak area % |
|--------|----------------------|------|------------------|-------------------|-------------------|-------------|
| 1      | 3.300                | BB   | 0.0831           | 3.44210           | 5.80983e-1        | 0.1767      |
| 2      | 4.171                | BB   | 0.0912           | 49.57061          | 8.36157           | 2.5451      |
| 3      | 5.050                | BB   | 0.0919           | 1894.68848        | 316.33862         | 97.2782     |

5

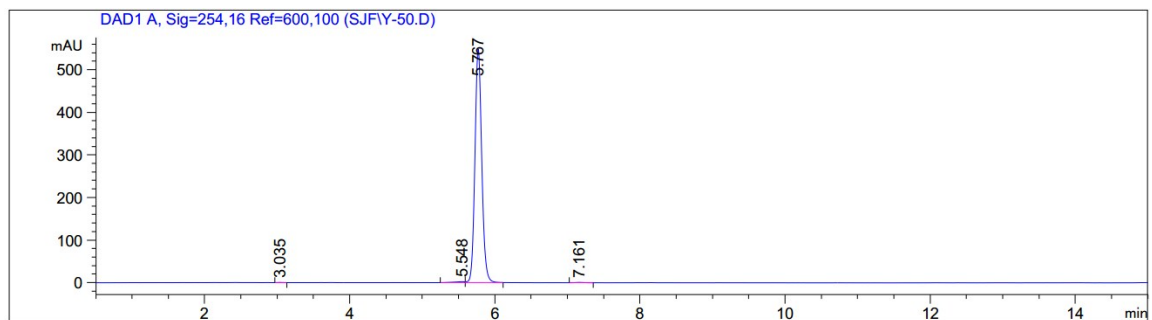

| Peak # | Retention time [min] | Type | Peak width [min] | Peak area [mAU*s] | Peak height [mAU] | Peak area % |
|--------|----------------------|------|------------------|-------------------|-------------------|-------------|
| 1      | 3.035                | BB   | 0.0639           | 1.34211           | 3.13774e-1        | 0.0372      |
| 2      | 5.548                | BV   | 0.1383           | 23.81199          | 2.27151           | 0.6598      |
| 3      | 5.767                | VB   | 0.1001           | 3578.33276        | 548.75793         | 99.1526     |
| 4      | 7.161                | BB   | 0.1123           | 5.42676           | 6.86198e-1        | 0.1504      |



9

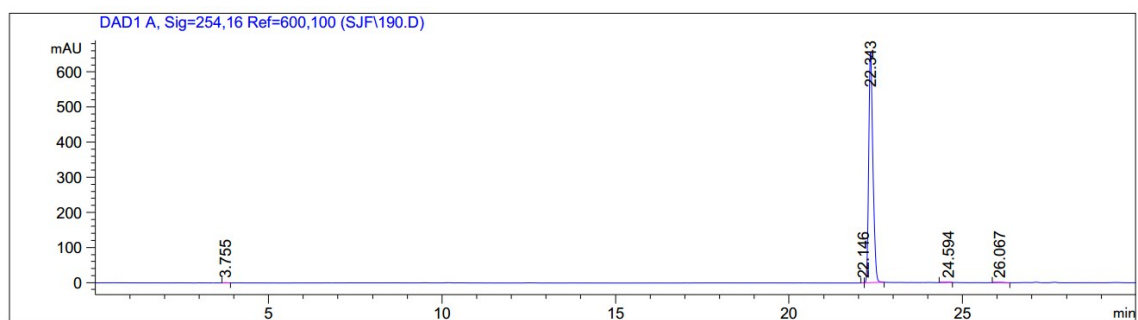

| Peak # | Retention time [min] | Type | Peak width [min] | Peak area [mAU*s] | Peak height [mAU] | Peak area % |
|--------|----------------------|------|------------------|-------------------|-------------------|-------------|
| 1      | 3.755                | BB   | 0.0818           | 3.01423           | 5.68799e-1        | 0.0542      |
| 2      | 22.146               | BV   | 0.0426           | 6.95182e-1        | 2.49083e-1        | 0.0125      |
| 3      | 22.343               | VB   | 0.1281           | 5531.15967        | 657.72260         | 99.4774     |
| 4      | 24.594               | BV   | 0.1681           | 13.09297          | 1.10586           | 0.2355      |
| 5      | 26.067               | BB   | 0.1670           | 12.25430          | 9.46701e-1        | 0.2204      |

12

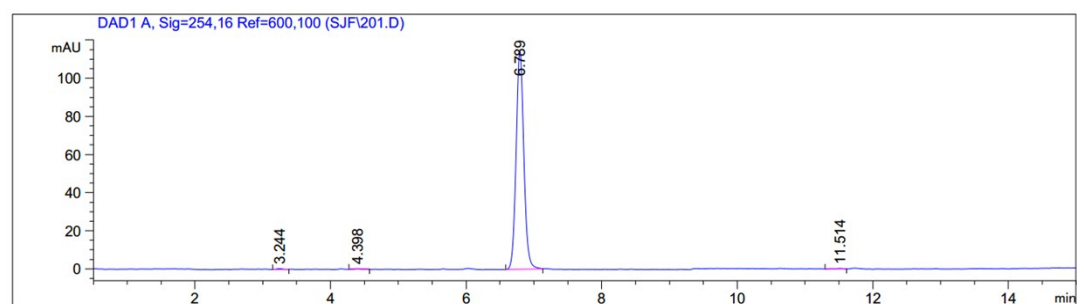

| Peak # | Retention time [min] | Type | Peak width [min] | Peak area [mAU*s] | Peak height [mAU] | Peak area % |
|--------|----------------------|------|------------------|-------------------|-------------------|-------------|
| 1      | 3.244                | BB   | 0.0799           | 2.50821           | 4.72824e-1        | 0.2729      |
| 2      | 4.398                | BB   | 0.1082           | 2.31618           | 3.21038e-1        | 0.2520      |
| 3      | 6.789                | BB   | 0.1206           | 911.10205         | 114.79269         | 99.1282     |
| 4      | 11.514               | BV   | 0.1250           | 3.18851           | 3.54225e-1        | 0.3469      |

16

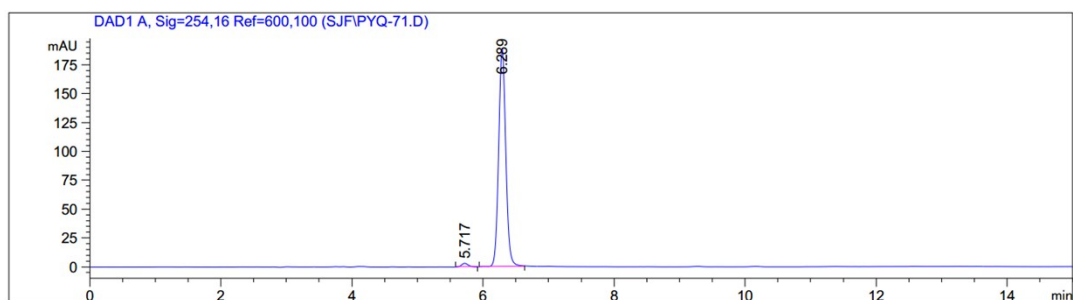

| Peak # | Retention time [min] | Type | Peak width [min] | Peak area [mAU*s] | Peak height [mAU] | Peak area % |
|--------|----------------------|------|------------------|-------------------|-------------------|-------------|
| 1      | 5.717                | BB   | 0.1072           | 21.54799          | 3.09743           | 1.4882      |
| 2      | 6.289                | BB   | 0.1163           | 1426.36230        | 188.55087         | 98.5118     |

20a

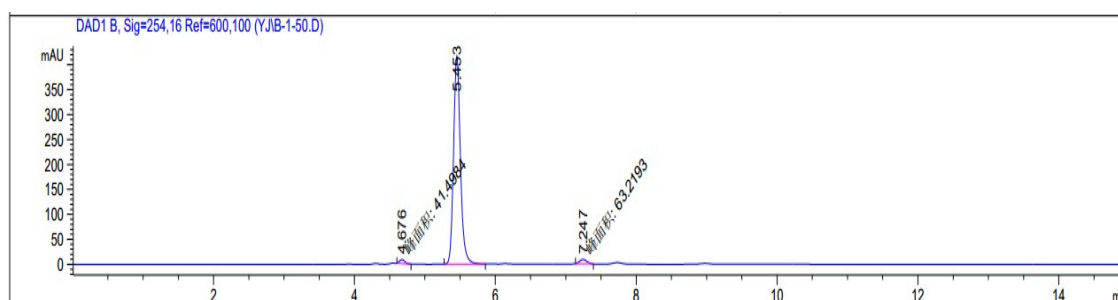

| Peak # | Retention time [min] | Type | Peak width [min] | Peak area [mAU*s] | Peak height [mAU] | Peak area % |
|--------|----------------------|------|------------------|-------------------|-------------------|-------------|
| 1      | 4.676                | MM T | 0.0860           | 41.49838          | 8.03788           | 1.4109      |
| 2      | 5.453                | BB   | 0.1054           | 2836.59424        | 416.73114         | 96.4398     |
| 3      | 7.247                | MM T | 0.1223           | 63.21931          | 8.61722           | 2.1494      |

20b

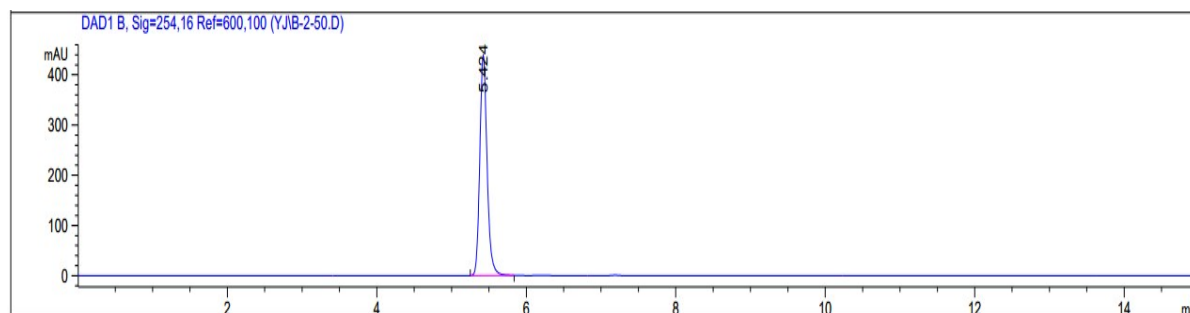



| Peak # | Retention time [min] | Type | Peak width [min] | Peak area [mAU*s] | Peak height [mAU] | Peak area % |
|--------|----------------------|------|------------------|-------------------|-------------------|-------------|
| 1      | 5.424                | BB   | 0.1051           | 2972.45459        | 438.60312         | 100.0000    |

20c

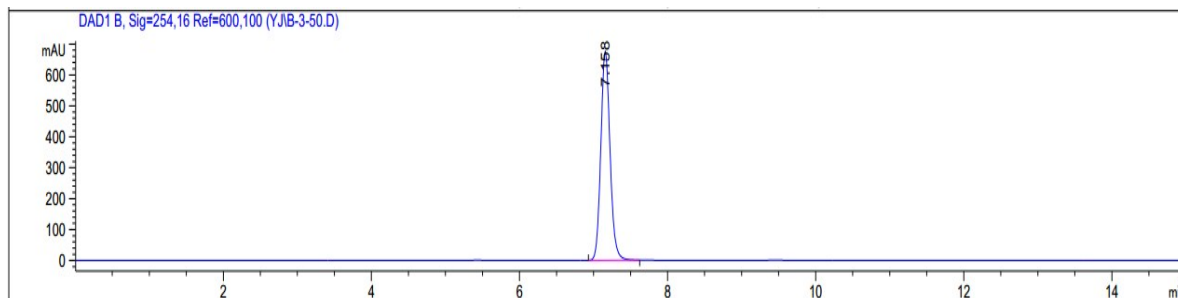

| Peak # | Retention time [min] | Type | Peak width [min] | Peak area [mAU*s] | Peak height [mAU] | Peak area % |
|--------|----------------------|------|------------------|-------------------|-------------------|-------------|
| 1      | 7.158                | BB   | 0.1350           | 5848.25781        | 675.50867         | 100.0000    |

20d

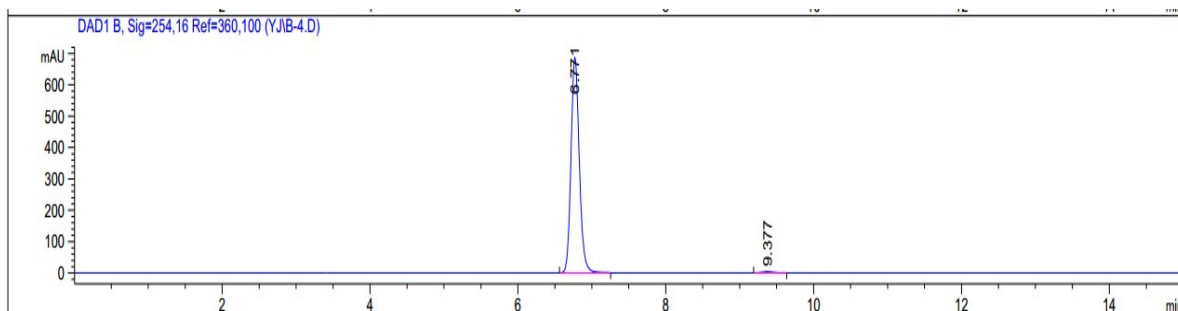

| Peak # | Retention time [min] | Type | Peak width [min] | Peak area [mAU*s] | Peak height [mAU] | Peak area % |
|--------|----------------------|------|------------------|-------------------|-------------------|-------------|
| 1      | 6.771                | BB   | 0.1189           | 5350.96777        | 686.86017         | 99.3465     |
| 2      | 9.377                | BB   | 0.1530           | 35.19823          | 3.57056           | 0.6535      |

20e

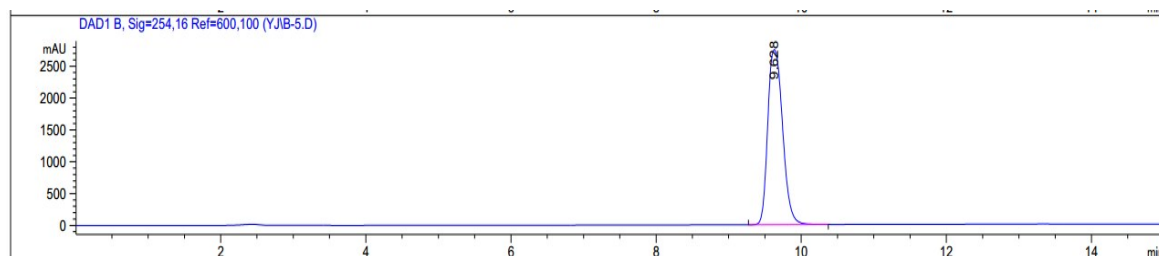

| Peak # | Retention time [min] | Type | Peak width [min] | Peak area [mAU*s] | Peak height [mAU] | Peak area % |
|--------|----------------------|------|------------------|-------------------|-------------------|-------------|
| 1      | 9.628                | BB   | 0.2256           | 3.90286e4         | 2749.10840        | 100.0000    |

23a

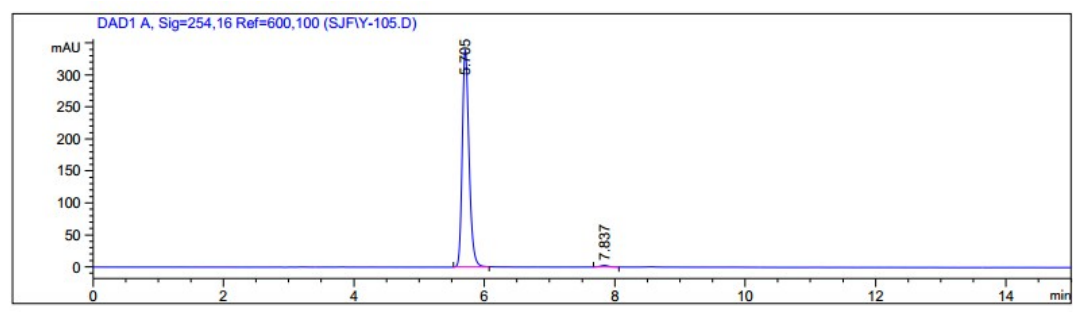

| Peak # | Retention time [min] | Type | Peak width [min] | Peak area [mAU*s] | Peak height [mAU] | Peak area % |
|--------|----------------------|------|------------------|-------------------|-------------------|-------------|
| 1      | 5.705                | BB   | 0.1124           | 2460.49023        | 339.96622         | 99.0593     |
| 2      | 7.837                | BB   | 0.1356           | 23.36452          | 2.63031           | 0.9407      |

23b

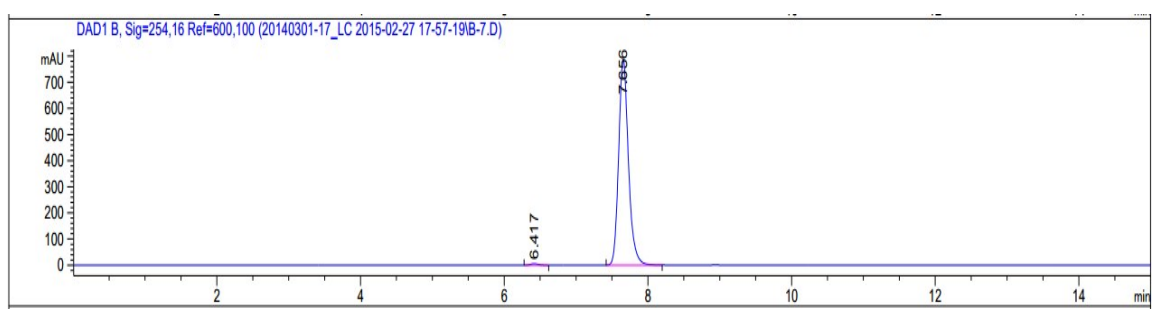

| Peak # | Retention time [min] | Type | Peak width [min] | Peak area [mAU*s] | Peak height [mAU] | Peak area % |
|--------|----------------------|------|------------------|-------------------|-------------------|-------------|
| 1      | 6.417                | BB   | 0.1160           | 41.11514          | 5.45114           | 0.5490      |
| 2      | 7.656                | BB   | 0.1443           | 7448.54053        | 787.91748         | 99.4510     |

23c

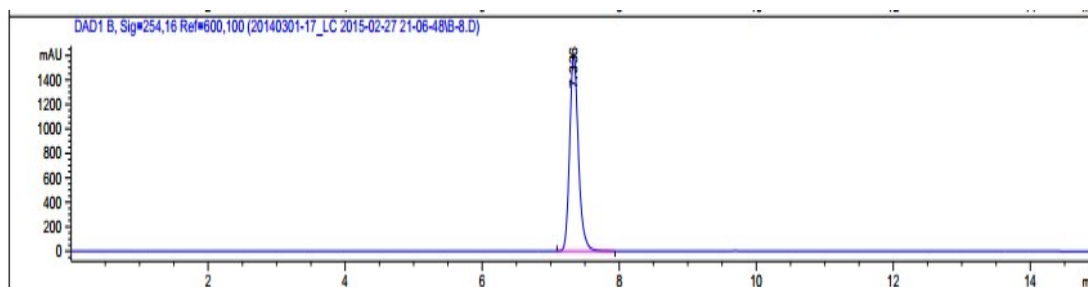

| Peak # | Retention time [min] | Type | Peak width [min] | Peak area [mAU*s] | Peak height [mAU] | Peak area % |
|--------|----------------------|------|------------------|-------------------|-------------------|-------------|
| 1      | 7.336                | BB   | 0.1360           | 1.42723e4         | 1601.76782        | 100.0000    |

23d

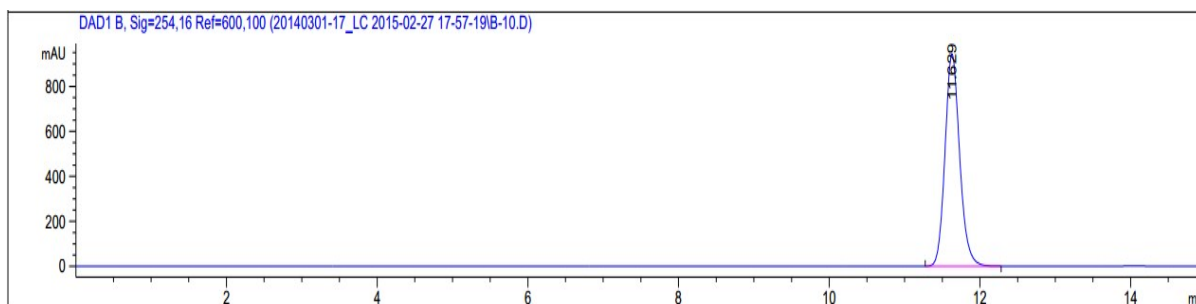

| Peak # | Retention time [min] | Type | Peak width [min] | Peak area [mAU*s] | Peak height [mAU] | Peak area % |
|--------|----------------------|------|------------------|-------------------|-------------------|-------------|
| 1      | 11.629               | BB   | 0.2078           | 1.27728e4         | 944.15472         | 100.0000    |
